# Supplementary material for: Technical note: Characterization of steady-state fluorescence properties of polystyrene latex spheres using off- and on-line spectroscopic methods
Source: Copernicus journal article supplement (doi:10.5194/amt-2017-407), 2018-02-08
Supplement: Supplementary file 1 [file amt-2017-407-supplement.pdf]

*Supplement of*

**Technical note: Characterization of steady-state fluorescence properties of polystyrene latex spheres using off- and on-line spectroscopic methods**

Tobias Könnemann<sup>1</sup>, Nicole J. Savage<sup>2</sup>, J. Alex Huffman<sup>2</sup>, and Christopher Pöhlker<sup>1</sup>

<sup>1</sup>*Max Planck Institute for Chemistry, Multiphase Chemistry and Biogeochemistry Departments, P.O. Box 3060, D-55020 Mainz, Germany.*

<sup>2</sup>*University of Denver, Department of Chemistry and Biochemistry, 2190 E. Illif Ave., Denver, Colorado 80208, USA.*

*Correspondence to:* C. Pöhlker (c.pohlker@mpic.de)

**This file includes:**

Fig. S1

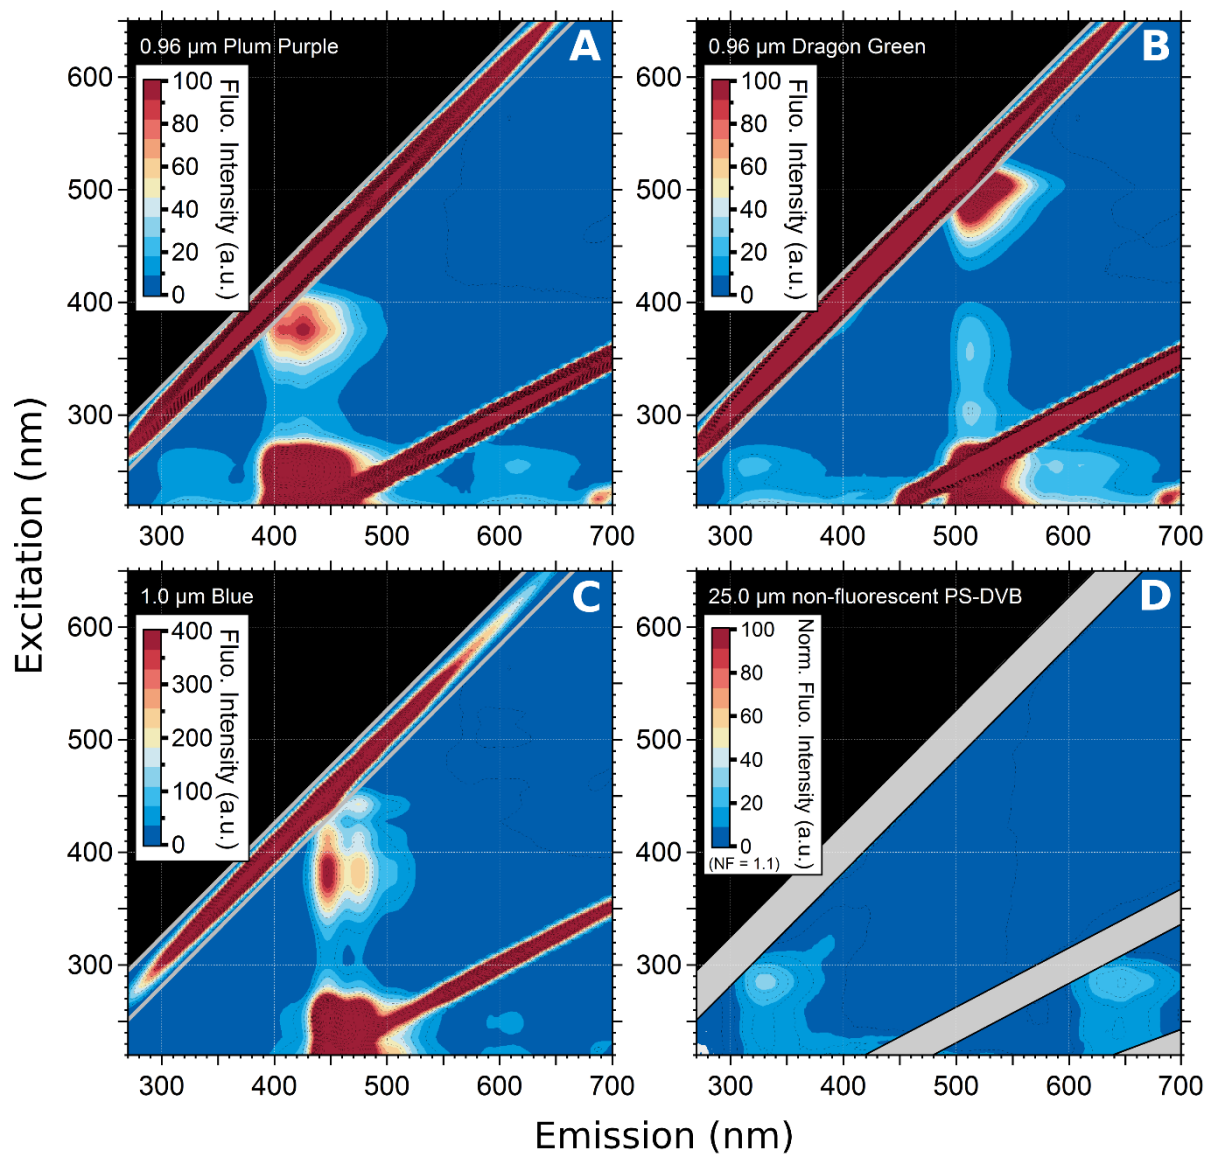

**Figure S1.** Excitation-emission matrix of selected PSLs showing multimodal steady-state fluorescence signatures.
